# Supplementary material for: Template-free synthesis of hierarchical ZnFe2O4yolk–shell microspheres for high-sensitivity acetone sensors
Source: Royal Society of Chemistry journal article supplement (doi:10.1039/c5nr06308f), 2015-10-14
Supplement: c5nr06308f1.pdf [file c5nr06308f1.pdf]

## Electronic Supplementary Information

### **Template-free Synthesis of Hierarchical ZnFe<sub>2</sub>O<sub>4</sub> Yolk-Shell Microspheres for High-Sensitive Acetone Sensors**

Xin Zhou, Boqun Wang, Hongbin Sun, Chen Wang, Peng Sun,\* Xiaowei Li,  
Xiaolong Hu, Geyu Lu\*

State Key Laboratory on Integrated Optoelectronics, College of Electronic Science  
and Engineering, Jilin University, Changchun 130012, People's Republic of China.

\*Corresponding Authors: Tel: +86 431 85167808; Fax: +86 431 85167808.

E-mail addresses: spmaster2008@163.com, luyg@jlu.edu.cn

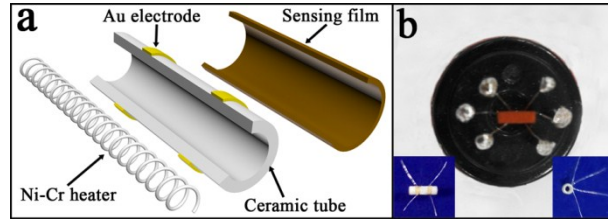

Fig. S1† (a) Schematic diagram of the gas sensor device. (b) Photograph of the completed sensor. The insets of panel b are the photographs of the ceramic tube.

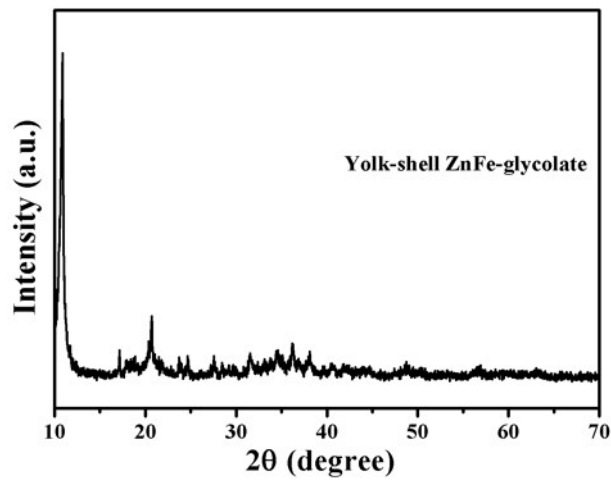

Fig. S2† XRD pattern of the yolk-shell ZnFe-glycolate.

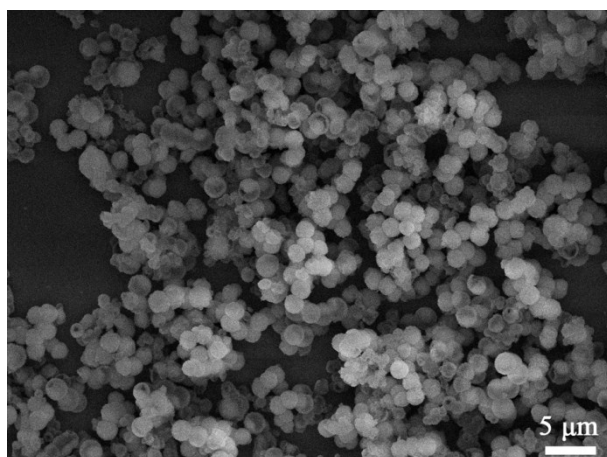

Fig. S3† Panoramic FESEM image of the yolk-shell ZnFe-glycolate microspheres.

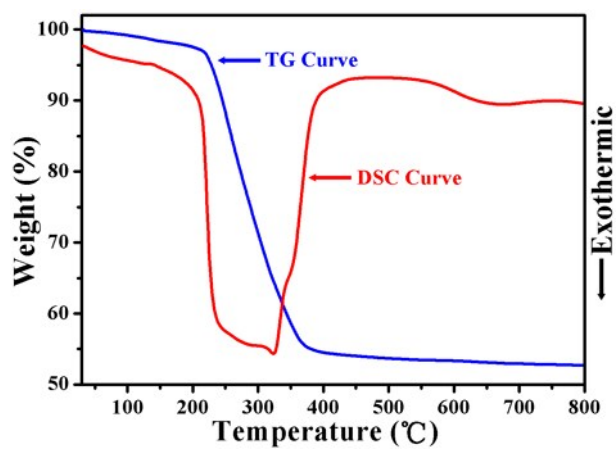

Fig. S4† TG and DSC curves of the ZnFe-glycolate precursor.

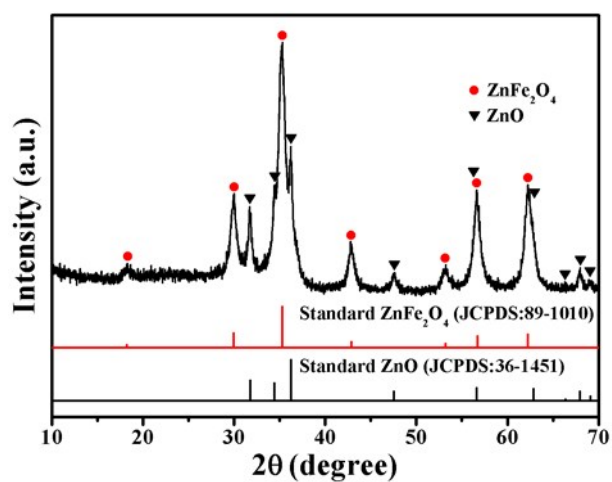

Fig. S5† XRD pattern of the product obtained by directly annealing the precursor.

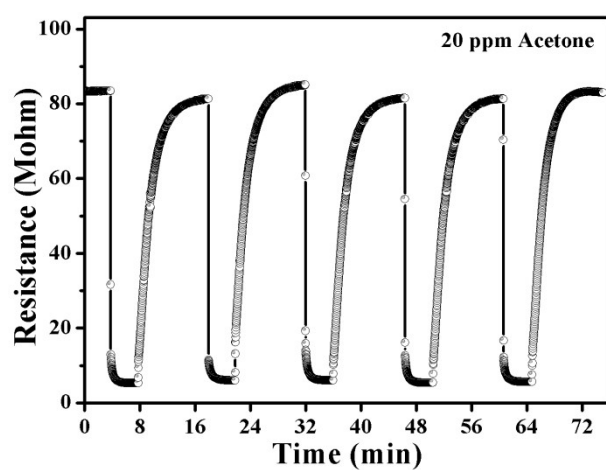

Fig. S6† Displaying five periods of response-recovery curve to 20 ppm acetone for yolk-shell  $\text{ZnFe}_2\text{O}_4$  microspheres.

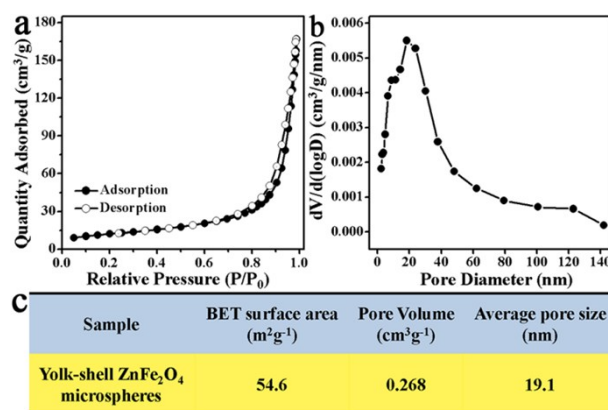

Fig. S7† (a) N<sub>2</sub> adsorption-desorption isotherm, (b) the corresponding pore size distribution curve and (c) textural parameters of the as-obtained yolk-shell ZnFe<sub>2</sub>O<sub>4</sub> microspheres.
